# Supplementary material for: Electrically-generated memristor based on inkjet printed silver nanoparticles
Source: Royal Society of Chemistry journal article supplement (doi:10.1039/c9na00329k), 2019-01-01
Supplement: c9na00329k1.pdf [file c9na00329k1.pdf]

## Electronic Supporting Information

### Electrically- generated Memristor based on Inkjet Printed Silver Nanoparticles

Kyung Jean Yoon<sup>a,b</sup>, Jin-Woo Han<sup>a,\*</sup>, Dong-Il Moon<sup>a</sup>, Myeong Lok Seol<sup>a</sup>, M. Meyyappan<sup>a</sup>, Han Joon Kim<sup>b</sup>, and Cheol Seong Hwang<sup>b,\*</sup>

<sup>a</sup>Center for Nanotechnology, NASA Ames Research Center, Moffet Field, CA, 94035, USA

<sup>b</sup>Department of Materials Science and Engineering and Inter-university Semiconductor Research Center, Seoul National University, Seoul, 151-744, Korea

#### 1. Supporting current-voltage curves for the fabricated devices.

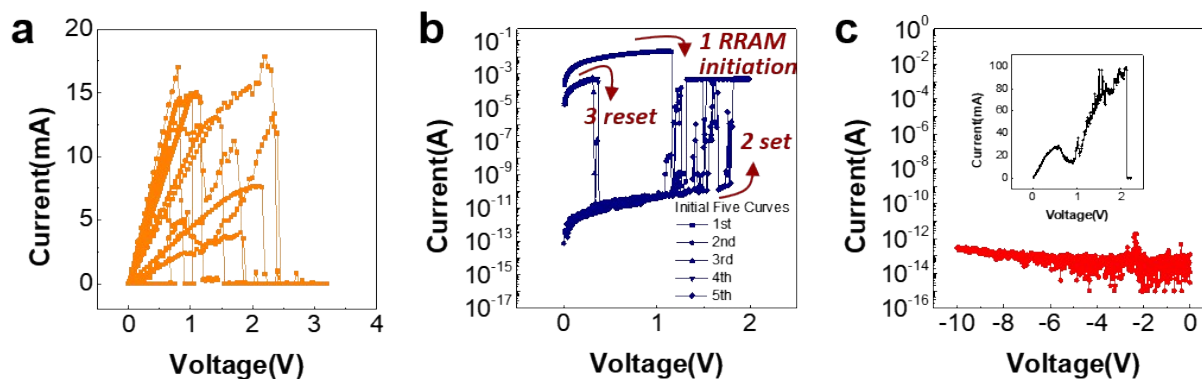

**Figure S1** (a) Stochastic Ohmic resistances of planar 1p-ink A devices, representing the incomplete metal sintering from the Ag nanoparticles. (b) Resistive switching in a planar 1p-ink A device after it undergoes the initial metal rupture described in (a). However, the switching is not as reliable as those in the hourglass-shape memristors shown in Figure 1d, and Figures 3-4 in the main text. (c) Memristor switching disabled in an hourglass 2p-ink A device with an abnormally large cross-section. The large cross-section is achieved through assigning a narrow gap between the two metal electrodes during printing. The initial metal rupture was only possible through anomalously high current almost up to 100mA. (Inset figure)

## 2. COMSOL simulation environment

The adopted parameters for the geometry as well as the resultant absolute temperature and electric field values here may slightly differ from the real situation. The main purpose of this work is to provide insight into the thermofield distribution along filaments with specific geometry, and to compare the differences according to the filament geometry, given identical device and material parameters. 2D device models with hourglass and conical filaments are shown below. The rest of the parameters in the conical filament model are analogous to those of the hourglass shape. The simulation was conducted over the 3D surface rotating the 2D model about the  $r=0$  axis.

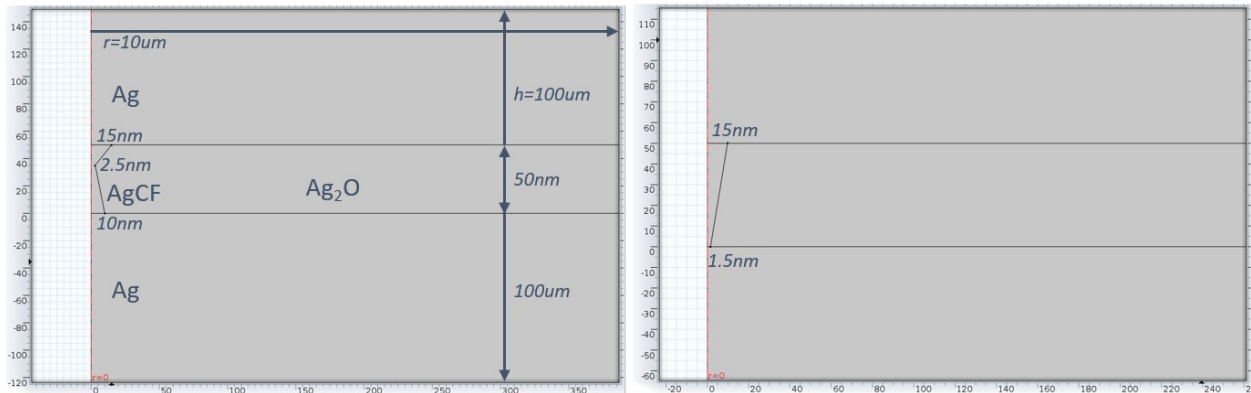

**Figure S2** Device model: Geometry

**Table S1** Device model: Material

|                   | Thermal conductivity<br>[W/m-K] | Density<br>[kg/m <sup>3</sup> ] | Heat capacity<br>[J/K-kg] | Electrical conductivity<br>[S/m] |
|-------------------|---------------------------------|---------------------------------|---------------------------|----------------------------------|
| Ag                | 400                             | 10490                           | 240                       | $2 \times 10^6$ *                |
| Ag <sub>2</sub> O | 10                              | 7140                            | 284                       | 200                              |

\* Experimental value.
